## Associations of Race/Ethnicity and Other Demographic and Socioeconomic Factors with Vaccination During the COVID-19 Pandemic in the United States

Daniel Kim, MD, DrPH\*

Bouvé College of Health Sciences & School of Public Policy  
and Urban Affairs, Northeastern University  
360 Huntington Avenue, 413 International Village  
Boston MA 02115

*\*E-mail: [d.kim@northeastern.edu](mailto:d.kim@northeastern.edu); Phone: 617-373-5802*

## Abstract

**BACKGROUND.** To date, there has been limited data available to understand the associations between race/ethnicity and socioeconomic and related characteristics with COVID-19 vaccine initiation and planned vaccination in the United States. To better characterize COVID-19 vaccinations nationally, the present study leveraged nationally-representative data with relatively complete race/ethnicity and socioeconomic data to estimate levels of vaccine initiation and the adjusted relative odds of vaccine initiation and planned vaccination among adults by race/ethnicity and socioeconomic and other characteristics.

**METHODS.** Using pooled cross-sectional data from 66,994 adults aged 18-85 years in nationally-representative surveys by the U.S. Census Bureau administered between January 6, 2021 and January 18, 2021 and multivariable logistic regression, this study estimated the associations between race/ethnicity, education, and pre-pandemic (2019) household income with the self-reported: 1) receipt of  $\geq 1$  dose of a COVID-19 vaccine; and 2) either receipt of  $\geq 1$  dose of a COVID-19 vaccine or the plan to definitely receive a vaccine once available to the respondent.

**RESULTS.** In Hispanics and Black non-Hispanics, the estimated prevalences of vaccine initiation were 6.1% and 6.2%, respectively, compared to 8.7% in White non-Hispanics and 15.1% in Asian non-Hispanics. Controlling for demographic and socioeconomic factors, Hispanics and Black non-Hispanics were no more or less likely than White non-Hispanics to have received  $\geq 1$  vaccine dose. However, for the combined outcome of either vaccine initiation or planned vaccination, Black non-Hispanics were 52% less likely than White non-Hispanics to have reported either outcome ( $P < .001$ ). Meanwhile,

both education and pre-pandemic income levels exhibited evidence of positive dose-response relationships with vaccine initiation ( $P$  for linear trend = .01 and <.001, respectively). Substantial (vs. no) financial hardship was linked to 44% lower odds of vaccination ( $P<.001$ ). The most common reasons for vaccine hesitancy were concerns about side effects and safety.

**CONCLUSIONS.** In this large, nationally-representative study with relatively complete race/ethnicity and socioeconomic data, we find that being Black non-Hispanic and having the least education and income were each independently associated with a markedly lower likelihood of definitely planning to get vaccinated or having been vaccinated. In the ensuing months of the pandemic, addressing racial/ethnic and socioeconomic inequities in vaccination due to differential access and vaccine hesitancy will be critical to mitigate the pandemic's disproportionately higher risks of infection and adverse outcomes in Black non-Hispanics and socioeconomically disadvantaged groups and to help maximize vaccination coverage nationwide.

A recent CDC analysis examined demographic characteristics of nearly 13 million persons who received  $\geq 1$  dose of one of two authorized coronavirus disease 2019 (COVID-19) vaccines administered in the United States between December 14, 2020 and January 14, 2021.<sup>1</sup> These individuals represented approximately 5% of the total U.S. population aged  $\geq 16$  years.<sup>1</sup> While data on age and sex were reported for  $>97.0\%$  of vaccine recipients, race/ethnicity information was missing for nearly half (49.1%) of individuals, and no socioeconomic data were collected. The study's investigators and other epidemiologists have called attention to the critical need for more complete reporting of race and ethnicity data to ensure an effective response to racial/ethnic disparities in COVID-19 vaccination, especially among those at disproportionately higher risks for infection and severe adverse health outcomes.<sup>1,2</sup> Furthermore, while the Advisory Committee on Immunization Practices prioritized COVID-19 vaccination of healthcare personnel and long-term care facility residents during the initial phase,<sup>3</sup> equity considerations should be factored into vaccine allocation.<sup>4,5</sup> To better characterize COVID-19 vaccinations nationally, the present study leveraged nationally-representative data with relatively complete race/ethnicity and socioeconomic data to estimate levels of vaccine initiation and the adjusted relative odds of vaccine initiation and planned vaccination among adults by race/ethnicity and socioeconomic and other characteristics.

## Methods

Pooled cross-sectional data were used from adults aged 18-85 years in nationally-representative Household Pulse Surveys (HPS) by the U.S. Census Bureau, administered between January 6, 2021 and January 18, 2021.<sup>6</sup> The online survey response rate was 6.4%.

The main predictors were race/ethnicity, education, and pre-pandemic (2019) household income. Outcomes consisted of the self-reported: 1) receipt of  $\geq 1$  dose of a COVID-19 vaccine; and 2) either receipt of  $\geq 1$  dose of a COVID-19 vaccine or the plan to definitely receive a vaccine once available to the respondent. 1.9% of the sample did not respond to either of the survey items corresponding to these outcomes.

Multivariable logistic regression models were fit to estimate adjusted odds ratios with generalized estimating equations for each outcome to account for survey weights and obtain robust standard errors. Log-Poisson regression was not employed due to bias when estimating relative risks for binary outcomes.<sup>7</sup> All models included all of the above main predictors, and were also adjusted for age, gender, marital status, household size, children in household, financial hardship, and state of residence. Multiple imputation analysis (using 20 multiply imputed datasets) was employed to handle missing data. All analyses were conducted using SAS (version 9.4; SAS Institute).

## Results

The final sample was comprised of 66,994 adults, representative of 243 million Americans. Of individuals who reported their COVID-19 vaccination status, race or ethnicity information was missing in 3.92% of the sample, and was previously handled using hot deck imputation.<sup>5</sup> *Figure 1* illustrates the racial/ethnic group variations in receiving  $\geq 1$  vaccine dose. In Hispanics and Black non-Hispanics, the estimated prevalences of vaccine initiation were 6.1% and 6.2%, respectively, compared to 8.7% in White non-Hispanics and 15.1% in Asian non-Hispanics. Across all races and ethnicities, the estimated prevalence of vaccine initiation was 7.6%. Controlling for other demographic and socioeconomic factors, Hispanics and Black non-Hispanics were no more or less likely than White non-Hispanics to have received  $\geq 1$  vaccine dose (*Table 1*). Asian non-Hispanics were 79% more likely than White non-Hispanics to have received  $\geq 1$  vaccine dose ( $P < .001$ ). Meanwhile, both education and pre-pandemic income levels exhibited evidence of positive dose-response relationships ( $P$  for linear trend = .01 and  $< .001$ , respectively). Compared to those with at least a college education, those with less than a high school education were 59% less likely to have been vaccinated ( $P < .001$ ). Compared to those with 2019 income levels  $\geq \$200,000$ , those with income levels  $< \$25,000$  were 47% less likely to have been vaccinated ( $P = .001$ ). Substantial (vs no) financial hardship was linked to 44% lower odds of vaccination ( $P < .001$ ).

Similar patterns were mostly observed for the combined outcome of receiving  $\geq 1$  vaccine dose or definitely planning to receive the vaccine (*Table 1*). However, unlike the

single outcome of vaccine initiation, Black non-Hispanics were 52% less likely than White non-Hispanics to have reported either outcome ( $P < .001$ ). The most common reasons for vaccine hesitancy were concerns about side effects (overall—51.2%; Black non-Hispanics—51.3%; Hispanics—51.5%), and safety (overall—50.0%; Black non-Hispanics—56.4%; Hispanics—50.7%).

## Discussion

In a large, nationally-representative study with relatively complete race/ethnicity and socioeconomic data, being Black non-Hispanic and having the least education and income were each independently associated with markedly lower odds of definitely planning to get vaccinated or having been vaccinated. Study limitations include its cross-sectional and observational design, which cannot rule out bias due to confounding. While sampling weights and raking accounted for non-response and undercoverage, the low survey response rate could have led to selection bias. Last, all measures were based on self-report, and could be subject to biases such as related to social desirability of reporting vaccination. Although the levels of vaccine initiation appeared to be higher based on this survey compared to the levels in the CDC analysis, this might be attributed in part to selection bias or social desirability bias and/or the 4 additional days covered in the HPS administration period.

In spite of the inherent limitations of this study, its core findings still underscore major inequities in vaccine initiation and/or planned vaccination by race/ethnicity, socioeconomic position, as well as financial hardship during the pandemic. This study

further heeds recent calls for more comprehensive race and ethnicity data to identify and respond to racial/ethnic disparities in COVID-19 vaccination.<sup>1,2</sup> In the ensuing months of the pandemic, addressing such racial/ethnic and socioeconomic inequities in vaccination due to differential access and vaccine hesitancy will be critical to mitigate the pandemic's disproportionately higher risks for infection and adverse health outcomes in Black non-Hispanics and socioeconomically disadvantaged groups and to help maximize vaccination coverage nationwide.<sup>1,5</sup> In addition to the ongoing work of the CDC with jurisdictions to bring vaccines to socially vulnerable communities,<sup>1</sup> the federal government's capacity to provide economic relief to reduce financial hardship may play a vital role in improving overall vaccination rates and reducing socioeconomic inequities in vaccination, while also attenuating negative impacts on the mental, physical, and social needs for millions of Americans.<sup>8</sup>



## References

1. Painter EM, Ussery EN, Patel A, Hughes MM, Zell ER, Moulia DL, et al.  
Demographic Characteristics of Persons Vaccinated During the First Month of the COVID-19 Vaccination Program—United States, December 14, 2020–January 14, 2021. *MMWR. Morbidity and Mortality Weekly Report*. 2021;70.
2. Krieger N, Waterman P, Chen JT, Testa C, Santillana M, Hanage WP. Plague of US missing COVID-19 data for race/ethnicity: Debacle continues with vaccination data. HCPDS Working Paper Volume 21, No. 1, February 8, 2021.
3. McClung N, Chamberland M, Kinlaw K, et al. The Advisory Committee on Immunization Practices' ethical principles for allocating initial supplies of COVID-19 vaccine—United States, 2020. *MMWR Morbidity & Mortality Weekly Report*. 2020;69:1782–6.
4. Essien UR, Eneanya ND, Crews DC. Prioritizing equity in a time of scarcity: the COVID-19 Pandemic. *Journal of General Internal Medicine*. 2020 Sep;35(9):2760-2.
5. National Academies of Sciences, Engineering, and Medicine 2020. *Framework for Equitable Allocation of COVID-19 Vaccine*. Washington, DC: The National Academies Press. <https://doi.org/10.17226/25917>
6. U.S. Census Bureau. *Household Pulse Survey: Measuring Social and Economic Impacts during the Coronavirus Pandemic*. Accessed at: <https://www.census.gov/programs-surveys/household-pulse-survey.html>
7. Zhu C, Blizzard L, Stankovich J, Wills K, Hosmer DW. Be wary of using Poisson regression to estimate risk and relative risk. *Biostatistics and Biometrics Open Access Journal*. 2018;4(5):1-3.

8. Kim D. Financial hardship and social assistance as determinants of mental health and food and housing insecurity during the COVID-19 pandemic. *medRxiv*. 2021 Jan 25.

**Figure 1. Estimated Percentages of Adults Aged 18-85 Years Who Have Received at Least 1 Dose of COVID-19 Vaccine During the Pandemic by Race/Ethnicity, U.S. Census Bureau Household Survey, January 2021.<sup>a</sup>**

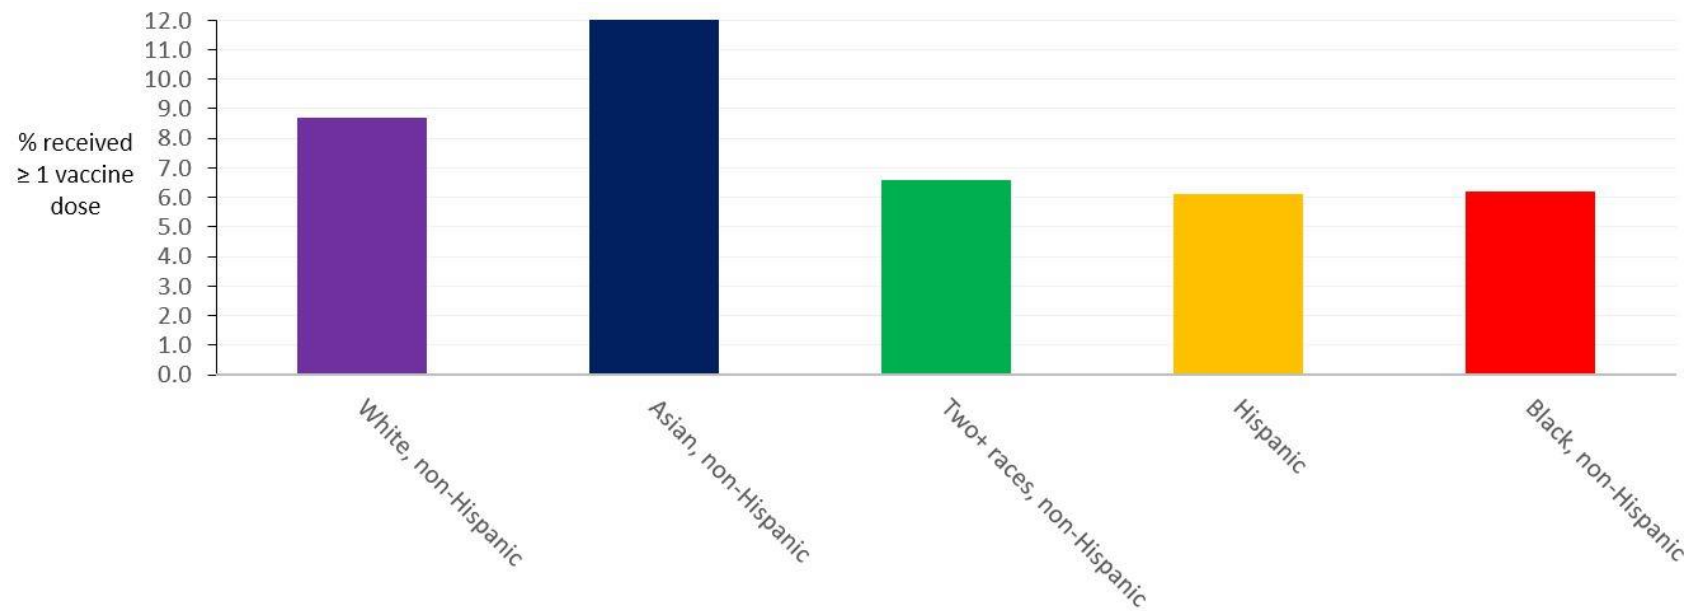

Abbreviations: COVID-19, coronavirus disease 2019.

<sup>a</sup> Aggregate data were drawn from the U.S. Census Bureau Household Pulse Survey public-use data tables for surveys administered between January 6, 2021 and January 18, 2021.

**Table 1. Demographic and Socioeconomic Predictors of COVID-19 Vaccination and Planned Vaccination During the Pandemic, U.S. Census Bureau Household Pulse Survey, January 2021. <sup>a</sup>**

| Predictor                  | Outcome                          |         |                                                               |         |
|----------------------------|----------------------------------|---------|---------------------------------------------------------------|---------|
|                            | Received ≥1 vaccine dose         |         | Received ≥1 vaccine dose or definitely plan to get vaccinated |         |
|                            | Odds ratio (95% CI) <sup>b</sup> | P value | Odds ratio (95% CI) <sup>b</sup>                              | P value |
| Age                        |                                  |         |                                                               |         |
| 18-29 (ref)                | 1.00                             | -       | 1.00                                                          | -       |
| 30-39                      | 1.21 (1.00, 1.46)                | .05     | 1.01 (0.89, 1.15)                                             | .84     |
| 40-49                      | 1.34 (1.10, 1.64)                | .004    | 1.13 (0.99, 1.29)                                             | .08     |
| 50-64                      | 1.47 (1.20, 1.80)                | <.001   | 1.72 (1.51, 1.95)                                             | <.001   |
| 65-74                      | 0.95 (0.75, 1.19)                | .64     | 3.24 (2.77, 3.78)                                             | <.001   |
| 75+                        | 1.55 (1.13, 2.12)                | .01     | 5.04 (3.95, 6.42)                                             | <.001   |
| Race/ethnicity             |                                  |         |                                                               |         |
| White non-Hispanic (ref)   | 1.00                             | -       | 1.00                                                          | -       |
| Asian non-Hispanic         | 1.79 (1.48, 2.18)                | <.001   | 1.67 (1.41, 1.99)                                             | <.001   |
| ≥2 races non-Hispanic      | 0.93 (0.74, 1.17)                | .55     | 0.65 (0.54, 0.79)                                             | <.001   |
| Hispanic                   | 1.06 (0.88, 1.26)                | .56     | 1.20 (1.07, 1.35)                                             | .002    |
| Black non-Hispanic         | 0.92 (0.76, 1.10)                | .36     | 0.48 (0.42, 0.54)                                             | <.001   |
| Sex                        |                                  |         |                                                               |         |
| Male (ref)                 | 1.00                             | -       | 1.00                                                          | -       |
| Female                     | 1.69 (1.53, 1.88)                | <.001   | 0.91 (0.85, 0.98)                                             | .01     |
| Education                  |                                  |         |                                                               |         |
| <High school               | 0.41 (0.27, 0.63)                | <.001   | 0.40 (0.33, 0.49)                                             | <.001   |
| High school                | 0.40 (0.34, 0.48)                | <.001   | 0.37 (0.33, 0.40)                                             | <.001   |
| Some college               | 0.76 (0.69, 0.85)                | <.001   | 0.54 (0.51, 0.58)                                             | <.001   |
| ≥College (ref)             | 1.00                             | -       | 1.00                                                          | -       |
| <b>P for trend</b>         |                                  | <.001   |                                                               | <.001   |
| Household income (2019)    |                                  |         |                                                               |         |
| <\$25,000                  | 0.53 (0.36, 0.77)                | .001    | 0.58 (0.46, 0.72)                                             | <.001   |
| \$25,000-\$34,999          | 0.63 (0.46, 0.87)                | .005    | 0.60 (0.49, 0.75)                                             | <.001   |
| \$35,000-\$49,999          | 0.68 (0.51, 0.91)                | .01     | 0.65 (0.52, 0.80)                                             | <.001   |
| \$50,000-\$74,999          | 0.78 (0.62, 0.98)                | .04     | 0.70 (0.58, 0.85)                                             | <.001   |
| \$75,000-\$99,999          | 0.79 (0.63, 0.997)               | .047    | 0.68 (0.55, 0.84)                                             | <.001   |
| \$100,000-\$149,999        | 0.96 (0.78, 1.17)                | .66     | 0.72 (0.59, 0.89)                                             | .002    |
| \$150,000-\$199,999        | 1.06 (0.83, 1.34)                | .65     | 0.88 (0.70, 1.11)                                             | .28     |
| ≥\$200,000 (ref)           | 1.00                             | -       | 1.00                                                          | -       |
| <b>P for trend</b>         |                                  | .01     |                                                               | <.001   |
| Financial hardship         |                                  |         |                                                               |         |
| Not at all difficult (ref) | 1.00                             | -       | 1.00                                                          | -       |
| A little difficult         | 0.89 (0.78, 1.00)                | .06     | 0.89 (0.81, 0.97)                                             | .01     |
| Somewhat difficult         | 0.69 (0.59, 0.80)                | <.001   | 0.77 (0.70, 0.86)                                             | <.001   |
| Very difficult             | 0.56 (0.44, 0.70)                | <.001   | 0.72 (0.63, 0.81)                                             | <.001   |
| <b>P for trend</b>         |                                  | <.001   |                                                               | <.001   |

| Marital status            |                   |     |                   |     |
|---------------------------|-------------------|-----|-------------------|-----|
| <i>Married (ref)</i>      | 1.00              | -   | 1.00              | -   |
| <i>Widowed</i>            | 0.81 (0.61, 1.08) | .15 | 1.03 (0.81, 1.31) | .83 |
| <i>Divorced/Separated</i> | 0.99 (0.85, 1.16) | .92 | 0.86 (0.77, 0.97) | .01 |
| <i>Never Married</i>      | 0.80 (0.68, 0.94) | .01 | 0.97 (0.87, 1.08) | .61 |

Abbreviations: CI, confidence interval; COVID-19, coronavirus disease 2019.

<sup>a</sup> All models included the above predictor variables, and were also adjusted for household size, presence of children in household, and state of residence. Participants were surveyed in the U.S. Census Bureau Household Pulse Surveys between January 6, 2021 and January 18, 2021. All estimates are for adults age 18-85 years. Financial hardship refers to difficulty in paying usual household expenses over the previous week.

<sup>b</sup> Odds ratio point estimates, 95% confidence intervals, and *P* values were derived from logistic regression models fit using generalized estimating equations that incorporated person weights and robust standard errors. Missing data were handled using 20 multiple imputation data sets.
